# Supplementary material for: Breakfast Characteristics and Its Association with Daily Micronutrients Intake in Children and Adolescents–A Systematic Review and Meta-Analysis
Source: PubMed Central journal article supplement (PMC7589686; doi:10.3390/nu12103201), 2020-10-20
Supplement: nutrients-12-03201-s001.pdf [file nutrients-12-03201-s001.pdf]

## AXIS tool: Quality Appraisal Findings

### Key

Y = Yes

N = No/Not Reported

| Author, Year                          | Introduction              |                             | Methods                  |                              |                               |                                |                              |                                  |                                        |                                                     |          |                              | Results                       |                                   |                                       |                           | Discussion                  |                         | Other                                         |                            |
|---------------------------------------|---------------------------|-----------------------------|--------------------------|------------------------------|-------------------------------|--------------------------------|------------------------------|----------------------------------|----------------------------------------|-----------------------------------------------------|----------|------------------------------|-------------------------------|-----------------------------------|---------------------------------------|---------------------------|-----------------------------|-------------------------|-----------------------------------------------|----------------------------|
|                                       | Clear Aims/<br>Objectives | Appropriate<br>Study Design | Justified Sample<br>Size | Defined Target<br>Population | Appropriate<br>Sampling Frame | Appropriate<br>Sampling Method | Non-Respondents<br>Addressed | Risk and<br>Outcome<br>Variables | Valid Data<br>Collection Tools<br>Used | Use of Statistical<br>Significance and<br>Precision | Study is | Adequate Data<br>Description | Non-Response<br>Bias Concerns | Description of<br>Non-Respondents | Internal<br>Consistency of<br>Results | All Analyses<br>Described | Conclusions<br>Justified by | Limitations<br>Reported | Funding/<br>Conflicts of<br>Interest Declared | Ethics/Consent in<br>place |
| Affenito, S.<br>et al. 2005           | Y                         | Y                           | Y                        | Y                            | Y                             | Y                              | N                            | Y                                | N                                      | Y                                                   | Y        | N                            | N                             | N                                 | Y                                     | Y                         | Y                           | Y                       | Y                                             | Y                          |
| Affenito, S.<br>et al. 2013           | Y                         | Y                           | Y                        | Y                            | Y                             | Y                              | N                            | Y                                | N                                      | Y                                                   | Y        | Y                            | N                             | N                                 | Y                                     | Y                         | Y                           | Y                       | N                                             | Y                          |
| Afeiche, M.<br>et al. 2017            | Y                         | Y                           | Y                        | Y                            | Y                             | Y                              | N                            | Y                                | N                                      | Y                                                   | Y        | Y                            | N                             | N                                 | Y                                     | Y                         | Y                           | Y                       | Y                                             | Y                          |
| Albertson, A.<br>et al. 2003          | Y                         | Y                           | Y                        | Y                            | Y                             | Y                              | N                            | Y                                | Y                                      | Y                                                   | Y        | Y                            | N                             | N                                 | Y                                     | Y                         | Y                           | Y                       | N                                             | N                          |
| Albertson, A.<br>et al. 2008          | Y                         | Y                           | Y                        | Y                            | Y                             | Y                              | N                            | Y                                | Y                                      | Y                                                   | Y        | N                            | N                             | N                                 | Y                                     | Y                         | Y                           | Y                       | Y                                             | Y                          |
| Balvin<br>Frantzen, L.<br>et al. 2013 | Y                         | Y                           | N                        | Y                            | N                             | N                              | N                            | Y                                | Y                                      | Y                                                   | Y        | Y                            | N                             | N                                 | Y                                     | Y                         | Y                           | Y                       | Y                                             | Y                          |
| Barr, S. et al.                       | Y                         | Y                           | Y                        | Y                            | Y                             | Y                              | Y                            | Y                                | N                                      | Y                                                   | Y        | Y                            | Y                             | N                                 | Y                                     | Y                         | Y                           | Y                       | Y                                             | Y                          |

| Author, Year                    | Introduction              | Methods                     |                          |                              |                               |                                |                              |                                  |                                           |                                                     |          |                              | Results                       |                                   |                                       |                           | Discussion                  |                         | Other                                         |                            |
|---------------------------------|---------------------------|-----------------------------|--------------------------|------------------------------|-------------------------------|--------------------------------|------------------------------|----------------------------------|-------------------------------------------|-----------------------------------------------------|----------|------------------------------|-------------------------------|-----------------------------------|---------------------------------------|---------------------------|-----------------------------|-------------------------|-----------------------------------------------|----------------------------|
|                                 | Clear Aims/<br>Objectives | Appropriate<br>Study Design | Justified Sample<br>Size | Defined Target<br>Population | Appropriate<br>Sampling Frame | Appropriate<br>Sampling Method | Non-Respondents<br>Addressed | Risk and<br>Outcome<br>Variables | Valid Data<br>Collection<br>Tools<br>Used | Use of Statistical<br>Significance and<br>Precision | Study is | Adequate Data<br>Description | Non-Response<br>Bias Concerns | Description of<br>Non-Respondents | Internal<br>Consistency of<br>Results | All Analyses<br>Described | Conclusions<br>Justified by | Limitations<br>Reported | Funding/<br>Conflicts of<br>Interest Declared | Ethics/Consent in<br>place |
| 2014                            |                           |                             |                          |                              |                               |                                |                              |                                  |                                           |                                                     |          |                              |                               |                                   |                                       |                           |                             |                         |                                               |                            |
| Barr, SI. et al. 2018           | Y                         | Y                           | ?                        | Y                            | Y                             | ?                              | ?                            | Y                                | N                                         | Y                                                   | Y        | Y                            | N                             | N                                 | Y                                     | Y                         | Y                           | Y                       | Y                                             | Y                          |
| Barton, B. et al. 2005          | Y                         | Y                           | Y                        | Y                            | Y                             | Y                              | N                            | Y                                | Y                                         | Y                                                   | Y        | Y                            | N                             | N                                 | Y                                     | Y                         | Y                           | N                       | Y                                             | Y                          |
| Coulthard, j. et al. 2017       | Y                         | Y                           | Y                        | Y                            | Y                             | Y                              | N                            | Y                                | Y                                         | Y                                                   | Y        | Y                            | N                             | N                                 | Y                                     | Y                         | Y                           | Y                       | N                                             | Y                          |
| Deshmukh-Taskar, p. et al. 2010 | Y                         | Y                           | Y                        | Y                            | Y                             | Y                              | N                            | Y                                | N                                         | Y                                                   | Y        | Y                            | N                             | N                                 | Y                                     | Y                         | Y                           | Y                       | Y                                             | Y                          |
| Fayet-Moore, F. et al. 2016     | Y                         | Y                           | Y                        | Y                            | Y                             | Y                              | N                            | Y                                | Y                                         | Y                                                   | Y        | Y                            | N                             | N                                 | Y                                     | Y                         | Y                           | Y                       | Y                                             | Y                          |
| Fayet-Moore, F. 2017            | Y                         | Y                           | Y                        | Y                            | Y                             | Y                              | N                            | N                                | N                                         | Y                                                   | Y        | N                            | N                             | N                                 | Y                                     | Y                         | Y                           | Y                       | Y                                             | Y                          |
| Fulgoni, VL. et al. 2019        | Y                         | Y                           | ?                        | Y                            | Y                             | ?                              | ?                            | Y                                | N                                         | Y                                                   | Y        | Y                            | N                             | N                                 | Y                                     | Y                         | Y                           | Y                       | Y                                             | Y                          |
| Gibson, S. et al. 1995          | Y                         | Y                           | Y                        | Y                            | Y                             | Y                              | N                            | Y                                | Y                                         | Y                                                   | Y        | Y                            | N                             | N                                 | Y                                     | Y                         | Y                           | N                       | N                                             | N                          |

| Author, Year                 | Introduction              | Methods                     |                          |                              |                               |                                |                              |                                  |                                        |                                                     |          |                              | Results                       |                                   |                                       |                           |                             | Discussion              |                                               | Other                      |  |
|------------------------------|---------------------------|-----------------------------|--------------------------|------------------------------|-------------------------------|--------------------------------|------------------------------|----------------------------------|----------------------------------------|-----------------------------------------------------|----------|------------------------------|-------------------------------|-----------------------------------|---------------------------------------|---------------------------|-----------------------------|-------------------------|-----------------------------------------------|----------------------------|--|
|                              | Clear Aims/<br>Objectives | Appropriate<br>Study Design | Justified Sample<br>Size | Defined Target<br>Population | Appropriate<br>Sampling Frame | Appropriate<br>Sampling Method | Non-Respondents<br>Addressed | Risk and<br>Outcome<br>Variables | Valid Data<br>Collection Tools<br>Used | Use of Statistical<br>Significance and<br>Precision | Study is | Adequate Data<br>Description | Non-Response<br>Bias Concerns | Description of<br>Non-Respondents | Internal<br>Consistency of<br>Results | All Analyses<br>Described | Conclusions<br>Justified by | Limitations<br>Reported | Funding/<br>Conflicts of<br>Interest Declared | Ethics/Consent in<br>place |  |
| Gibson, S. et al. 1999       | Y                         | Y                           | Y                        | Y                            | Y                             | Y                              | N                            | Y                                | Y                                      | Y                                                   | Y        | N                            | N                             | N                                 | Y                                     | Y                         | Y                           | Y                       | Y                                             | Y                          |  |
| Gibson, S. et al. 2003       | Y                         | Y                           | Y                        | Y                            | Y                             | Y                              | N                            | Y                                | Y                                      | Y                                                   | Y        | N                            | N                             | N                                 | Y                                     | N                         | Y                           | N                       | Y                                             | Y                          |  |
| Matthys, C. et al. 2007      | Y                         | Y                           | N                        | Y                            | Y                             | N                              | N                            | Y                                | Y                                      | Y                                                   | Y        | Y                            | N                             | N                                 | Y                                     | Y                         | Y                           | Y                       | Y                                             | Y                          |  |
| McNulty, H. et al. 1996      | Y                         | Y                           | N                        | Y                            | N                             | N                              | N                            | Y                                | N                                      | Y                                                   | Y        | N                            | N                             | N                                 | Y                                     | Y                         | Y                           | N                       | Y                                             | Y                          |  |
| Michels, N. et al. 2015      | Y                         | Y                           | Y                        | Y                            | Y                             | Y                              | N                            | Y                                | N                                      | Y                                                   | Y        | Y                            | N                             | N                                 | Y                                     | Y                         | Y                           | Y                       | Y                                             | Y                          |  |
| Mielgo-Ayuso, J. et al. 2017 | Y                         | Y                           | Y                        | Y                            | Y                             | Y                              | N                            | Y                                | N                                      | Y                                                   | Y        | Y                            | N                             | N                                 | Y                                     | Y                         | Y                           | Y                       | N                                             | Y                          |  |
| Mohd Nasir, MT. et al. 2017  | Y                         | Y                           | Y                        | Y                            | N                             | N                              | N                            | Y                                | N                                      | Y                                                   | Y        | Y                            | N                             | N                                 | Y                                     | Y                         | Y                           | Y                       | Y                                             | Y                          |  |
| Morgan, KJ. et al. 1981      | Y                         | Y                           | N                        | Y                            | Y                             | Y                              | N                            | Y                                | N                                      | Y                                                   | Y        | Y                            | N                             | N                                 | Y                                     | Y                         | Y                           | N                       | N                                             | N                          |  |
| Murakami, K.                 | Y                         | Y                           | Y                        | Y                            | N                             | N                              | N                            | Y                                | N                                      | Y                                                   | Y        | Y                            | N                             | N                                 | Y                                     | Y                         | Y                           | Y                       | N                                             | Y                          |  |

| Author, Year                    | Introduction              | Methods                     |                          |                              |                               |                                |                              |                                  |                                           |                                                     |          |                              | Results                       |                                   |                                       |                           | Discussion                  |                         | Other                                         |                            |
|---------------------------------|---------------------------|-----------------------------|--------------------------|------------------------------|-------------------------------|--------------------------------|------------------------------|----------------------------------|-------------------------------------------|-----------------------------------------------------|----------|------------------------------|-------------------------------|-----------------------------------|---------------------------------------|---------------------------|-----------------------------|-------------------------|-----------------------------------------------|----------------------------|
|                                 | Clear Aims/<br>Objectives | Appropriate<br>Study Design | Justified Sample<br>Size | Defined Target<br>Population | Appropriate<br>Sampling Frame | Appropriate<br>Sampling Method | Non-Respondents<br>Addressed | Risk and<br>Outcome<br>Variables | Valid Data<br>Collection<br>Tools<br>Used | Use of Statistical<br>Significance and<br>Precision | Study is | Adequate Data<br>Description | Non-Response<br>Bias Concerns | Description of<br>Non-Respondents | Internal<br>Consistency of<br>Results | All Analyses<br>Described | Conclusions<br>Justified by | Limitations<br>Reported | Funding/<br>Conflicts of<br>Interest Declared | Ethics/Consent in<br>place |
| et al. 2018                     |                           |                             |                          |                              |                               |                                |                              |                                  |                                           |                                                     |          |                              |                               |                                   |                                       |                           |                             |                         |                                               |                            |
| Ortega, RM.<br>et al. 1996      | Y                         | Y                           | N                        | Y                            | N                             | N                              | N                            | Y                                | Y                                         | Y                                                   | Y        | Y                            | N                             | N                                 | Y                                     | Y                         | Y                           | N                       | N                                             | Y                          |
| Ortega, RM<br>et al. 1998       | Y                         | Y                           | N                        | Y                            | N                             | N                              | N                            | Y                                | Y                                         | Y                                                   | Y        | Y                            | N                             | N                                 | Y                                     | Y                         | Y                           | N                       | Y                                             | Y                          |
| Papoutsou,<br>S. et al. 2014    | Y                         | Y                           | Y                        | Y                            | Y                             | Y                              | N                            | Y                                | N                                         | Y                                                   | Y        | Y                            | N                             | N                                 | Y                                     | Y                         | Y                           | Y                       | N                                             | Y                          |
| Preziosi, P. et<br>al. 1999     | Y                         | Y                           | N                        | Y                            | Y                             | Y                              | N                            | Y                                | N                                         | Y                                                   | Y        | N                            | N                             | N                                 | Y                                     | Y                         | Y                           | N                       | N                                             | N                          |
| Ramsay, SA.<br>et al. 2018      | Y                         | Y                           | N                        | Y                            | Y                             | Y                              | N                            | Y                                | N                                         | Y                                                   | Y        | Y                            | N                             | N                                 | Y                                     | Y                         | Y                           | Y                       | Y                                             | Y                          |
| Ruxton, CH.<br>et al. 1996      | Y                         | Y                           | N                        | Y                            | Y                             | Y                              | N                            | Y                                | Y                                         | Y                                                   | Y        | N                            | N                             | N                                 | Y                                     | Y                         | Y                           | N                       | Y                                             | Y                          |
| Vatanparast,<br>H. et al. 2019  | Y                         | Y                           | Y                        | Y                            | Y                             | Y                              | N                            | Y                                | N                                         | Y                                                   | Y        | Y                            | N                             | N                                 | Y                                     | Y                         | Y                           | Y                       | Y                                             | Y                          |
| Williams,<br>BM. et al.<br>2009 | Y                         | Y                           | Y                        | Y                            | Y                             | Y                              | N                            | Y                                | N                                         | Y                                                   | Y        | Y                            | N                             | N                                 | Y                                     | Y                         | Y                           | Y                       | Y                                             | N                          |

| Author, Year               | Introduction              | Methods                     |                          |                              |                               |                                |                              |                                  |                                        |                                                     |          |                              | Results                       |                                   |                                       |                           | Discussion                  |                         | Other                                         |                            |
|----------------------------|---------------------------|-----------------------------|--------------------------|------------------------------|-------------------------------|--------------------------------|------------------------------|----------------------------------|----------------------------------------|-----------------------------------------------------|----------|------------------------------|-------------------------------|-----------------------------------|---------------------------------------|---------------------------|-----------------------------|-------------------------|-----------------------------------------------|----------------------------|
|                            | Clear Aims/<br>Objectives | Appropriate<br>Study Design | Justified Sample<br>Size | Defined Target<br>Population | Appropriate<br>Sampling Frame | Appropriate<br>Sampling Method | Non-Respondents<br>Addressed | Risk and<br>Outcome<br>Variables | Valid Data<br>Collection Tools<br>Used | Use of Statistical<br>Significance and<br>Precision | Study is | Adequate Data<br>Description | Non-Response<br>Bias Concerns | Description of<br>Non-Respondents | Internal<br>Consistency of<br>Results | All Analyses<br>Described | Conclusions<br>Justified by | Limitations<br>Reported | Funding/<br>Conflicts of<br>Interest Declared | Ethics/Consent in<br>place |
| Williams P.<br>et al. 2007 | Y                         | Y                           | Y                        | Y                            | Y                             | Y                              | N                            | Y                                | N                                      | Y                                                   | Y        | Y                            | N                             | N                                 | Y                                     | Y                         | Y                           | N                       | N                                             | Y                          |
